# Supplementary material
Source: publisher site journal article supplement (https://www.dovepress.com/article/407060)
Supplement: Supplementary file 1 [file get_supplementary_file.php]

**Supplementary table 1**. Comorbidities of patients with melanoma and for the general population comparison cohort

|  | Advanced cutaneous  melanoma cohort | | General population  comparison cohort | |
| --- | --- | --- | --- | --- |
| Total | 1,236 | (100.0) | 123,600 | (100.0) |
| Myocardial infarction | 9 | (0.7) | 1,308 | (1.1) |
| Congestive heart failure | 26 | (2.1) | 1,598 | (1.3) |
| Peripheral vascular disease | 17 | (1.4) | 1,490 | (1.2) |
| Cerebrovascular disease | 28 | (2.3) | 2,861 | (2.3) |
| Dementia | <5 |  | 654 | (0.5) |
| Chronic pulmonary disease | 23 | (1.9) | 2,744 | (2.2) |
| Connective tissue disease | 18 | (1.5) | 1,044 | (0.8) |
| Ulcer disease | 9 | (0.7) | 963 | (0.8) |
| Mild liver disease | 6 | (0.5) | 334 | (0.3) |
| Diabetes I and II | 39 | (3.2) | 2,405 | (1.9) |
| Hemiplegia | <5 |  | 91 | (0.1) |
| Moderate to severe renal disease | 8 | (0.6) | 566 | (0.5) |
| Diabetes with end organ | 18 | (1.5) | 1,100 | (0.9) |
| Any tumor without melanoma | 60 | (4.9) | 3,270 | (2.6) |
| Leukemia | <5 |  | 126 | (0.1) |
| Lymphoma | 7 | (0.6) | 254 | (0.2) |
| Moderate to severe liver disease | <5 |  | 77 | (0.1) |
| Metastatic solid tumor | 37 | (3.0) | 349 | (0.3) |
| AIDS | 0 | (0.0) | 37 | (0.0) |
| Obesity | 16 | (1.3) | 1,005 | (0.8) |
| Alcoholism and alcoholism-related conditions | 9 | (0.7) | 841 | (0.7) |

**Supplementary Table 2** Crude and Standardized mortality rates in patients with advanced melanoma by calendar year of diagnosis and stage, unadjusted and adjusted hazard ratios for death, and corresponding 95% confidence intervals in advanced melanoma patients compared with the matched comparison cohort from the general population.

Stage - Distant (before 2004)

|  | MortRisk | Crude mortality rate/1000 PY* | Standardized mortality rate/1000 PY** | Unadjusted Hazard Ratio  (95% CI)*** | Adjusted Hazard Ratio  (95% CI)**** |
| --- | --- | --- | --- | --- | --- |
| **1980-1991** |  |  |  |  |  |
| Comparison cohort |  |  |  |  |  |
| 0 - 30 days | 0.3 (0.3–0.4) | 38.9 (30.6–47.3) | 36.0 (28.2–43.7) |  |  |
| 31-364 days | 3.7 (3.4–3.9) | 40.8 (38.2–43.4) | 38.9 (36.4–41.4) |  |  |
| 1-5 years | 15.5 (15.0–15.9) | 41.9 (40.6–43.3) | 43.2 (41.8–44.6) |  |  |
| 6-10 years | 19.1 (18.6–19.7) | 42.5 (41.2–43.8) | 52.3 (50.6–53.9) |  |  |
| 0-10 years | 34.4 (33.8–34.9) | 42.0 (41.1–42.9) | 46.3 (45.3–47.2) |  |  |
| Melanoma cohort |  |  |  |  |  |
| 0 - 30 days | 8.8 (6.0–13.0) | 1118.6 (661.4–1575.8) | 1102.4 (645.6–1559.1) | 29.8 (18.7–47.4) | 32.1 (19.4–53.1) |
| 31-364 days | 58.2 (52.0–64.5) | 999.4 (832.6–1166.1) | 1012.5 (840.7–1184.3) | 28.1 (23.2–34.0) | 28.3 (23.3–34.5) |
| 1-5 years | 72.7 (63.7–81.1) | 390.4 (300.2–480.5) | 426.9 (321.7–532.1) | 11.3 (8.8–14.4) | 11.0 (8.6–14.1) |
| 6-10 years | 37.0 (21.9–57.9) | 90.1 (34.2–145.9) | 188.9 (48.7–329.2) | 3.4 (1.8–6.4) | 3.1 (1.6–5.8) |
| 0-10 years | 93.5 (90.0–96.0) | 534.3 (467.1–601.4) | 587.2 (510.7–663.7) | 16.4 (14.3–18.8) | 15.7 (13.6–18.0) |
| **1992-2003** |  |  |  |  |  |
| Comparison cohort |  |  |  |  |  |
| 0 - 30 days | 0.3 (0.2–0.3) | 31.6 (24.2–39.1) | 29.4 (22.3–36.4) |  |  |
| 31-364 days | 3.2 (3.0–3.4) | 35.1 (32.7–37.5) | 32.7 (30.4–34.9) |  |  |
| 1-5 years | 13.1 (12.7–13.5) | 35.1 (33.9–36.3) | 34.9 (33.7–36.1) |  |  |
| 6-10 years | 17.5 (17.0–18.0) | 38.4 (37.2–39.6) | 43.8 (42.4–45.2) |  |  |
| 0-10 years | 30.7 (30.2–31.3) | 36.5 (35.8–37.3) | 38.3 (37.4–39.1) |  |  |
| Melanoma cohort |  |  |  |  |  |
| 0 - 30 days | 5.3 (3.2–8.7) | 651.2 (310.1–992.2) | 653.2 (299.4–1006.9) | 20.8 (11.7–37.1) | 14.8 (7.9–27.8) |
| 31-364 days | 55.6 (49.5–61.8) | 954.3 (796.2–1112.4) | 1015.5 (841.6–1189.3) | 30.8 (25.5–37.2) | 27.5 (22.5–33.6) |
| 1-5 years | 70.5 (62.0–78.7) | 377.3 (294.1–460.5) | 461.9 (342.2–581.6) | 15.0 (11.8–19.0) | 14.2 (11.1–18.1) |
| 6-10 years | 36.4 (22.5–55.1) | 91.7 (39.8–143.5) | 359.5 (0.0–759.2) | 3.6 (2.0–6.4) | 3.0 (1.6–5.3) |
| 0-10 years | 92.1 (88.5–94.9) | 481.1 (420.8–541.3) | 612.7 (526.1–699.4) | 18.1 (15.7–20.8) | 16.0 (13.9–18.4) |

Stage III (unknown if A, B or C)

|  | MortRisk | Crude mortality rate/1000 PY | Standardized mortality rate/1000 PY | Unadjusted Hazard Ratio | Adjusted Hazard Ratio |
| --- | --- | --- | --- | --- | --- |
| **2004-2007** |  |  |  |  |  |
| Comparison cohort |  |  |  |  |  |
| 0 - 30 days | 0.1 (0.1–0.4) | 18.0 (0.4–35.7) | 16.7 (0.3–33.1) |  |  |
| 31-364 days | 2.6 (2.1–3.3) | 28.8 (22.1–35.6) | 27.2 (20.8–33.6) |  |  |
| 1-5 years | 9.8 (8.7–11.0) | 25.7 (22.6–28.9) | 25.7 (22.5–28.8) |  |  |
| 6-10 years | 16.5 (14.3–19.1) | 36.3 (31.8–40.9) | 37.0 (32.3–41.7) |  |  |
| 0-10 years | 26.8 (24.6–29.2) | 29.7 (27.3–32.1) | 29.6 (27.2–32.0) |  |  |
| Melanoma cohort |  |  |  |  |  |
| 0 - 30 days | - | - | - | - | - |
| 31-364 days | 11.1 (3.7–30.6) | 125.8 (0.0–268.1) | 129.7 (0.0–276.6) | 5.3 (1.7–17.1) | 4.0 (1.2–13.1) |
| 1-5 years | 45.8 (28.6–67.3) | 146.4 (59.9–232.9) | 207.0 (68.5–345.6) | 5.6 (3.1–10.4) | 5.7 (3.1–10.6) |
| 6-10 years | - | - | - | - | - |
| 0-10 years | 51.9 (34.8–71.3) | 94.6 (45.0–144.1) | 141.6 (56.8–226.4) | 3.1 (1.8–5.3) | 3.1 (1.8–5.4) |
| **2008-2011** |  |  |  |  |  |
| Comparison cohort |  |  |  |  |  |
| 0 - 30 days | 0.1 (0.0–0.4) | 12.2 (0.0–29.1) | 12.8 (0.0–32.8) |  |  |
| 31-364 days | 0.8 (0.5–1.2) | 8.3 (4.1–12.4) | 11.6 (5.3–17.8) |  |  |
| 1-5 years | 4.8 (3.8–6.1) | 12.0 (9.2–14.7) | 15.7 (11.7–19.6) |  |  |
| 0-6 years | 6.6 (5.3–8.2) | 11.1 (8.9–13.4) | 14.6 (11.3–17.9) |  |  |
| Melanoma cohort |  |  |  |  |  |
| 0 - 30 days | - | - | - | - | - |
| 31-364 days | - | - | - | - | - |
| 1-5 years | 30.9 (13.7–60.5) | 88.8 (11.0–166.6) | 92.3 (0.0–189.9) | 8.2 (3.3–20.6) | 12.0 (4.6–31.2) |
| 0-6 years | 53.9 (22.3–90.7) | 75.9 (15.2–136.6) | 71.4 (0.6–142.1) | 7.4 (3.2–17.0) | 11.8 (5.0–28.1) |

Stage IIIA

|  | MortRisk | Crude mortality rate/1000 PY | Standardized mortality rate/1000 PY | Unadjusted Hazard Ratio | Adjusted Hazard Ratio |
| --- | --- | --- | --- | --- | --- |
| **2004-2007** |  |  |  |  |  |
| Comparison cohort |  |  |  |  |  |
| 0 - 30 days | 0.1 (0.1–0.2) | 14.9 (7.6–22.2) | 23.8 (11.6–36.1) |  |  |
| 31-364 days | 1.1 (0.9–1.3) | 12.2 (10.2–14.2) | 19.3 (16.0–22.6) |  |  |
| 1-5 years | 5.1 (4.7–5.5) | 13.0 (12.0–14.0) | 21.7 (19.9–23.4) |  |  |
| 6-10 years | 7.1 (6.3–7.9) | 15.1 (13.8–16.4) | 26.3 (23.8–28.8) |  |  |
| 0-10 years | 12.9 (12.0–13.7) | 13.7 (12.9–14.4) | 22.9 (21.6–24.2) |  |  |
| Melanoma cohort |  |  |  |  |  |
| 0 - 30 days | - | - | - | - | - |
| 31-364 days | 2.3 (0.7–6.9) | 25.2 (0.0–53.8) | 50.4 (0.0–107.5) | 2.1 (0.7–6.5) | 2.2 (0.7–7.2) |
| 1-5 years | 22.7 (16.3–30.9) | 65.7 (41.8–89.5) | 95.9 (53.1–138.7) | 5.4 (3.7–7.9) | 5.4 (3.7–7.9) |
| 6-10 years | 20.8 (9.1–43.5) | 31.1 (9.6–52.7) | 33.4 (7.8–58.9) | 2.2 (1.1–4.5) | 2.1 (1.1–4.4) |
| 0-10 years | 40.2 (27.9–55.3) | 48.3 (33.3–63.2) | 73.7 (45.9–101.6) | 3.8 (2.8–5.2) | 3.9 (2.8–5.3) |
| **2008-2011** |  |  |  |  |  |
| Comparison cohort |  |  |  |  |  |
| 0 - 30 days | 0.2 (0.1–0.3) | 20.7 (10.9–30.6) | 29.4 (15.1–43.7) |  |  |
| 31-364 days | 1.3 (1.1–1.6) | 14.6 (12.1–17.1) | 20.1 (16.5–23.6) |  |  |
| 1-5 years | 4.5 (4.0–5.0) | 11.5 (10.2–12.7) | 17.2 (15.2–19.1) |  |  |
| 0-6 years | 6.5 (5.9–7.3) | 12.3 (11.2–13.4) | 18.3 (16.6–20.0) |  |  |
| Melanoma cohort |  |  |  |  |  |
| 0 - 30 days | - | - | - | - | - |
| 31-364 days | 4.0 (1.5–10.3) | 44.1 (0.9–87.4) | 70.1 (1.4–138.8) | 3.1 (1.1–8.3) | 3.2 (1.2–8.7) |
| 1-5 years | 16.8 (9.9–27.8) | 49.2 (22.5–76.0) | 78.4 (30.3–126.4) | 4.6 (2.6–8.0) | 5.0 (2.8–8.7) |
| 0-6 years | 23.9 (14.7–37.5) | 48.2 (25.9–70.4) | 76.4 (38.1–114.6) | 4.1 (2.6–6.6) | 4.4 (2.7–7.0) |

Stage IIIB

|  | MortRisk | Crude mortality rate/1000 PY | Standardized mortality rate/1000 PY | Unadjusted Hazard Ratio | Adjusted Hazard Ratio |
| --- | --- | --- | --- | --- | --- |
| **2004-2007** |  |  |  |  |  |
| Comparison cohort |  |  |  |  |  |
| 0 - 30 days | 0.2 (0.2–0.4) | 29.6 (15.5–43.7) | 32.5 (16.6–48.4) |  |  |
| 31-364 days | 1.9 (1.6–2.2) | 20.7 (17.2–24.3) | 23.6 (19.4–27.8) |  |  |
| 1-5 years | 8.5 (7.9–9.2) | 22.3 (20.5–24.1) | 26.6 (24.3–28.8) |  |  |
| 6-10 years | 9.4 (8.3–10.7) | 22.0 (19.8–24.1) | 30.6 (27.3–33.8) |  |  |
| 0-10 years | 18.9 (17.6–20.2) | 22.0 (20.7–23.3) | 27.5 (25.8–29.2) |  |  |
| Melanoma cohort |  |  |  |  |  |
| 0 - 30 days | - | - | - | - | - |
| 31-364 days | 8.6 (3.9–18.1) | 97.9 (19.6–176.2) | 120.6 (13.6–227.6) | 4.7 (2.1–10.8) | 4.7 (2.0–10.9) |
| 1-5 years | 40.6 (29.8–53.7) | 135.2 (83.2–187.1) | 194.3 (105.1–283.4) | 8.4 (5.6–12.5) | 8.7 (5.8–13.0) |
| 6-10 years | 11.1 (3.6–31.3) | 29.0 (0.0–61.8) | 41.7 (0.0–101.6) | 1.6 (0.5–5.0) | 1.7 (0.5–5.3) |
| 0-10 years | 51.7 (40.2–64.4) | 96.4 (64.5–128.3) | 138.2 (83.5–192.8) | 5.5 (3.9–7.7) | 5.5 (3.9–7.8) |
| **2008-2011** |  |  |  |  |  |
| Comparison cohort |  |  |  |  |  |
| 0 - 30 days | 0.2 (0.1–0.3) | 19.4 (9.2–29.5) | 21.7 (10.3–33.2) |  |  |
| 31-364 days | 1.6 (1.4–1.9) | 17.7 (14.8–20.6) | 19.8 (16.5–23.0) |  |  |
| 1-5 years | 6.8 (6.2–7.4) | 18.0 (16.3–19.7) | 22.3 (20.2–24.4) |  |  |
| 0-6 years | 9.4 (8.6–10.3) | 17.7 (16.4–19.1) | 21.6 (19.9–23.3) |  |  |
| Melanoma cohort |  |  |  |  |  |
| 0 - 30 days | - | - | - | - | - |
| 31-364 days | 3.4 (1.1–10.2) | 37.7 (0.0–80.4) | 46.8 (0.0–100.2) | 2.1 (0.7–6.6) | 2.6 (0.8–8.2) |
| 1-5 years | 40.7 (30.1–53.5) | 150.7 (96.7–204.6) | 181.3 (113.1–249.5) | 8.9 (6.1–12.9) | 9.1 (6.2–13.3) |
| 0-6 years | 45.9 (34.4–59.2) | 114.7 (76.2–153.3) | 135.5 (88.0–183.1) | 6.7 (4.7–9.5) | 7.2 (5.1–10.2) |

Stage IIIC

|  | MortRisk | Crude mortality rate/1000 PY | Standardized mortality rate/1000 PY | Unadjusted Hazard Ratio | Adjusted Hazard Ratio |
| --- | --- | --- | --- | --- | --- |
| **2004-2007** |  |  |  |  |  |
| Comparison cohort |  |  |  |  |  |
| 0 - 30 days | 0.4 (0.3–0.7) | 53.2 (27.9–78.5) | 46.5 (24.2–68.7) |  |  |
| 31-364 days | 3.2 (2.7–3.8) | 35.8 (29.6–42.1) | 30.2 (24.8–35.7) |  |  |
| 1-5 years | 12.8 (11.7–13.9) | 34.2 (31.1–37.2) | 30.4 (27.6–33.1) |  |  |
| 6-10 years | 15.8 (14.0–17.9) | 36.2 (32.2–40.2) | 36.3 (32.2–40.4) |  |  |
| 0-10 years | 29.3 (27.4–31.2) | 35.3 (33.0–37.5) | 32.3 (30.2–34.5) |  |  |
| Melanoma cohort |  |  |  |  |  |
| 0 - 30 days | 2.6 (0.4–16.8) | 319.8 (0.0–946.7) | 344.6 (0.0–1019.9) | 6.4 (0.8–48.4) | 9.5 (1.2–75.8) |
| 31-364 days | 34.2 (21.5–51.5) | 417.9 (190.7–645.1) | 429.5 (166.7–692.3) | 11.8 (6.6–21.0) | 12.6 (6.9–23.1) |
| 1-5 years | 68.0 (49.8–84.8) | 335.1 (175.8–494.4) | 411.4 (164.3–658.5) | 23.0 (13.6–39.1) | 27.8 (16.3–47.5) |
| 6-10 years | 62.5 (19.2–98.9) | 121.4 (0.0–289.7) | 138.8 (0.0–331.8) | 7.9 (1.9–33.7) | 8.3 (1.9–35.2) |
| 0-10 years | 92.3 (74.4–99.2) | 324.9 (214.1–435.8) | 407.9 (241.1–574.8) | 14.7 (10.2–21.2) | 16.6 (11.4–24.0) |
| **2008-2011** |  |  |  |  |  |
| Comparison cohort |  |  |  |  |  |
| 0 - 30 days | 0.1 (0.0–0.2) | 7.0 (0.0–15.0) | 6.8 (0.0–14.4) |  |  |
| 31-364 days | 1.6 (1.3–1.9) | 17.2 (13.4–20.9) | 18.9 (14.6–23.2) |  |  |
| 1-5 years | 8.5 (7.5–9.6) | 20.2 (17.9–22.5) | 23.9 (21.1–26.8) |  |  |
| 0-6 years | 11.3 (10.0–12.7) | 19.2 (17.3–21.1) | 22.4 (20.1–24.7) |  |  |
| Melanoma cohort |  |  |  |  |  |
| 0 - 30 days | - | - | - | - | - |
| 31-364 days | 26.9 (16.9–41.2) | 338.1 (161.0–515.2) | 369.6 (169.6–569.7) | 19.8 (11.1–35.1) | 19.4 (10.3–36.6) |
| 1-5 years | 35.6 (21.4–55.2) | 136.8 (59.4–214.2) | 150.3 (54.4–246.2) | 6.9 (3.8–12.3) | 5.8 (3.2–10.6) |
| 0-6 years | 52.9 (39.3–68.0) | 190.5 (117.3–263.8) | 212.9 (125.9–299.8) | 10.1 (6.8–15.2) | 8.7 (5.7–13.2) |

Stage IV

| ' | MortRisk | Crude mortality rate/1000 PY | Standardized mortality rate/1000 PY | Unadjusted Hazard Ratio | Adjusted Hazard Ratio |
| --- | --- | --- | --- | --- | --- |
| **2004-2007** |  |  |  |  |  |
| Comparison cohort |  |  |  |  |  |
| 0 - 30 days | 0.3 (0.2–0.4) | 31.2 (18.4–43.9) | 28.4 (16.8–40.1) |  |  |
| 31-364 days | 3.0 (2.7–3.4) | 33.8 (29.8–37.8) | 31.3 (27.5–35.1) |  |  |
| 1-5 years | 12.5 (11.9–13.3) | 33.5 (31.5–35.5) | 33.1 (31.1–35.1) |  |  |
| 6-10 years | 12.3 (11.2–13.4) | 29.5 (27.2–31.7) | 31.9 (29.4–34.4) |  |  |
| 0-10 years | 25.8 (24.7–26.9) | 32.1 (30.7–33.5) | 32.5 (31.0–33.9) |  |  |
| Melanoma cohort |  |  |  |  |  |
| 0 - 30 days | 1.1 (0.2–7.6) | 135.3 (0.0–400.6) | 122.0 (0.0–361.0) | 4.3 (0.6–32.0) | 2.6 (0.3–20.4) |
| 31-364 days | 42.7 (33.2–53.6) | 607.8 (414.5–801.0) | 645.9 (426.4–865.5) | 19.7 (13.9–28.0) | 18.9 (13.2–27.1) |
| 1-5 years | 54.9 (42.0–68.8) | 210.1 (132.3–288.0) | 225.6 (137.1–314.0) | 6.1 (4.2–9.0) | 6.3 (4.3–9.3) |
| 6-10 years | 22.3 (9.9–45.6) | 83.4 (10.3–156.4) | 118.7 (0.0–238.2) | 3.7 (1.5–9.2) | 4.2 (1.7–10.4) |
| 0-10 years | 80.1 (71.3–87.6) | 273.3 (210.2–336.5) | 303.6 (228.7–378.5) | 9.0 (7.1–11.5) | 9.1 (7.2–11.7) |
| **2008-2011** |  |  |  |  |  |
| Comparison cohort |  |  |  |  |  |
| 0 - 30 days | 0.3 (0.2–0.4) | 34.1 (21.0–47.2) | 31.7 (18.6–44.9) |  |  |
| 31-364 days | 2.4 (2.1–2.7) | 26.0 (22.6–29.5) | 23.2 (20.1–26.3) |  |  |
| 1-5 years | 11.4 (10.5–12.3) | 29.6 (27.5–31.7) | 27.6 (25.6–29.6) |  |  |
| 0-6 years | 16.5 (14.9–18.3) | 28.9 (27.1–30.7) | 26.8 (25.1–28.4) |  |  |
| Melanoma cohort |  |  |  |  |  |
| 0 - 30 days | 2.2 (0.5–8.3) | 265.6 (0.0–633.8) | 219.2 (0.0–522.9) | 8.0 (1.9–33.6) | 6.3 (1.2–32.7) |
| 31-364 days | 47.3 (37.6–58.0) | 702.0 (492.2–911.9) | 710.8 (476.9–944.7) | 34.7 (24.5–49.1) | 33.9 (23.2–49.4) |
| 1-5 years | 42.8 (30.0–58.2) | 209.0 (117.4–300.7) | 302.7 (158.9–446.5) | 10.6 (6.7–16.9) | 8.9 (5.5–14.6) |
| 0-6 years | 70.5 (60.9–79.5) | 384.9 (291.3–478.4) | 457.0 (334.5–579.5) | 19.0 (14.6–24.9) | 17.3 (13.0–23.0) |

*PY- person year; ** standardized to age and sex distribution of melanoma cohort from 2010. ***Controlled for age, sex and calendar year by study design; **** Controlled for age, sex, and calendar year by study design, and additionally adjusted for obesity, alcoholism, and Charlson comorbidity index score.

**Supplementary** Table 3. Crude and standardized mortality rates in patients with advanced melanoma by age and sex, unadjusted and adjusted hazard ratios for death, and corresponding 95% confidence intervals in advanced melanoma patients compared with the matched comparison cohort from the general population.

| ' | MortRisk | Crude mortality rate/1000 PY* | Standardized mortality rate/1000 PY** | Unadjusted Hazard Ratio  (95% CI)*** | Adjusted Hazard Ratio  (95% CI)**** |
| --- | --- | --- | --- | --- | --- |
| **Age categories** |  |  |  |  |  |
| **18-44 years** |  |  |  |  |  |
| 0 - 30 days | 2.3 (0.9–5.3) | 275.5 (34.0–517.1) | 37.5 (4.4–70.7) | 167.9 (40.1–702.4) | 129.9 (29.6–570.3) |
| 31-364 days | 23.5 (18.4–29.7) | 297.8 (216.1–379.6) | 41.1 (29.8–52.5) | 273.1 (165.6–450.4) | 252.4 (149.6–425.9) |
| 1-5 years | 27.9 (21.6–35.7) | 91.1 (64.2–118.0) | 13.9 (9.8–18.1) | 57.6 (40.8–81.1) | 55.8 (39.1–79.7) |
| 6-10 years | 5.7 (1.6–18.9) | 13.5 (0.0–28.7) | 1.8 (0.0–3.8) | 6.5 (2.1–20.4) | 6.2 (1.9–19.7) |
| 0-10 years | 49.2 (42.1–56.8) | 114.9 (92.7–137.1) | 16.6 (13.3–19.8) | 66.0 (52.5–82.9) | 60.9 (47.9–77.3) |
| **45-54 years** |  |  |  |  |  |
| 0 - 30 days | 2.3 (1.0–5.4) | 279.5 (34.5–524.6) | 51.9 (6.2–97.6) | 72.1 (22.9–227.1) | 53.4 (15.9–180.1) |
| 31-364 days | 26.0 (20.7–32.5) | 333.5 (246.1–420.8) | 67.6 (49.8–85.4) | 79.6 (56.7–111.8) | 65.3 (46.0–92.6) |
| 1-5 years | 39.0 (31.6–47.5) | 135.8 (100.8–170.7) | 29.1 (21.5–36.7) | 26.4 (20.1–34.8) | 23.0 (17.3–30.7) |
| 6-10 years | 24.0 (13.5–40.5) | 60.9 (24.9–96.9) | 13.8 (5.6–22.0) | 7.4 (4.1–13.4) | 6.4 (3.5–11.9) |
| 0-10 years | 66.5 (58.7–74.2) | 163.7 (135.5–191.8) | 34.3 (28.3–40.3) | 28.1 (23.4–33.8) | 24.0 (19.8–29.0) |
| **55-64 years** |  |  |  |  |  |
| 0 - 30 days | 1.5 (0.6–3.8) | 178.7 (3.6–353.9) | 40.8 (0.0–81.8) | 17.5 (6.0–50.6) | 12.1 (4.1–35.6) |
| 31-364 days | 30.7 (25.6–36.6) | 410.2 (321.9–498.4) | 88.8 (69.2–108.4) | 36.0 (28.2–46.0) | 33.0 (25.7–42.3) |
| 1-5 years | 41.3 (34.3–49.0) | 143.6 (110.6–176.5) | 30.2 (23.2–37.2) | 11.4 (9.0–14.4) | 11.3 (9.0–14.4) |
| 6-10 years | 25.6 (14.1–43.6) | 60.4 (24.7–96.1) | 13.4 (5.5–21.4) | 3.3 (1.8–6.0) | 3.6 (2.0–6.5) |
| 0-10 years | 70.2 (62.7–77.3) | 186.6 (158.7–214.6) | 39.8 (33.8–45.9) | 13.7 (11.7–16.0) | 13.8 (11.8–16.1) |
| **65-74 years** |  |  |  |  |  |
| 0 - 30 days | 4.4 (2.5–7.7) | 551.6 (239.5–863.7) | 232.7 (100.7–364.6) | 19.4 (10.5–36.0) | 13.9 (7.4–26.0) |
| 31-364 days | 39.5 (33.9–45.8) | 565.4 (455.7–675.2) | 247.5 (199.4–295.6) | 19.4 (15.7–23.8) | 16.6 (13.4–20.4) |
| 1-5 years | 56.6 (48.7–64.9) | 249.7 (196.3–303.1) | 112.4 (88.3–136.5) | 8.0 (6.4–9.9) | 7.9 (6.3–9.8) |
| 6-10 years | 38.7 (21.5–62.7) | 86.8 (33.0–140.6) | 39.8 (14.9–64.7) | 1.9 (1.0–3.5) | 2.0 (1.1–3.7) |
| 0-10 years | 84.6 (77.9–90.2) | 317.8 (274.6–361.0) | 141.6 (122.3–160.8) | 9.5 (8.2–10.9) | 9.3 (8.1–10.6) |
| **75+ years** |  |  |  |  |  |
| 0 - 30 days | 6.0 (3.7–9.8) | 749.3 (370.1–1128.5) | 322.6 (159.1–486.2) | 7.9 (4.7–13.3) | 6.5 (3.8–11.0) |
| 31-364 days | 48.1 (41.9–54.7) | 745.2 (607.8–882.6) | 328.1 (267.4–388.7) | 8.1 (6.7–9.8) | 7.7 (6.4–9.3) |
| 1-5 years | 70.9 (62.2–79.1) | 353.3 (277.3–429.3) | 157.3 (123.3–191.3) | 3.4 (2.7–4.2) | 3.3 (2.6–4.1) |
| 6-10 years | 62.1 (36.2–87.7) | 145.8 (44.8–246.8) | 62.6 (17.9–107.4) | 1.0 (0.5–2.0) | 0.9 (0.5–1.9) |
| 0-10 years | 94.6 (89.1–97.9) | 473.8 (411.1–536.6) | 209.3 (181.5–237.2) | 4.5 (3.9–5.2) | 4.3 (3.7–4.9) |
| **Sex categories** |  |  |  |  |  |
| **Females** |  |  |  |  |  |
| 0 - 30 days | 3.8 (2.5–5.7) | 464.6 (265.9–663.4) | 213.5 (121.1–305.9) | 17.0 (10.7–27.0) | 12.7 (7.9–20.3) |
| 31-364 days | 33.0 (29.2–37.2) | 446.6 (380.8–512.4) | 213.3 (181.3–245.3) | 17.3 (14.8–20.2) | 17.2 (14.7–20.2) |
| 1-5 years | 35.7 (30.8–41.2) | 122.1 (100.2–143.9) | 68.6 (55.8–81.3) | 4.6 (3.8–5.5) | 6.0 (5.0–7.1) |
| 6-10 years | 19.8 (12.4–30.7) | 41.7 (21.9–61.5) | 26.8 (13.0–40.5) | 1.3 (0.8–2.0) | 1.7 (1.1–2.8) |
| 0-10 years | 66.8 (61.7–71.7) | 182.7 (163.1–202.2) | 98.8 (87.8–109.9) | 6.5 (5.8–7.3) | 7.9 (7.1–8.8) |
| **Males** |  |  |  |  |  |
| 0 - 30 days | 2.9 (1.9–4.5) | 363.7 (204.3–523.1) | 201.1 (112.5–289.6) | 12.2 (7.7–19.4) | 9.6 (6.0–15.3) |
| 31-364 days | 34.6 (31.1–38.4) | 477.8 (415.8–539.8) | 269.2 (233.7–304.6) | 16.0 (14.0–18.4) | 16.1 (14.0–18.5) |
| 1-5 years | 53.9 (49.1–58.8) | 220.5 (191.5–249.4) | 135.6 (116.6–154.5) | 7.2 (6.3–8.2) | 9.2 (8.1–10.6) |
| 6-10 years | 30.7 (21.1–43.4) | 74.7 (46.0–103.4) | 49.6 (28.6–70.7) | 2.1 (1.4–3.1) | 2.9 (2.0–4.2) |
| 0-10 years | 79.7 (75.5–83.6) | 262.5 (239.4–285.6) | 161.7 (146.8–176.6) | 8.3 (7.6–9.1) | 10.1 (9.2–11.1) |

*PY- person year; ** standardized to age and sex distribution of melanoma cohort from 2010. ***Controlled for age, sex and calendar year by study design; **** Controlled for age, sex, and calendar year by study design, and additionally adjusted for obesity, alcoholism, and Charlson comorbidity index score.
